# Supplementary material
Source: Research Square preprint supplement (doi:10.21203/rs.3.rs-9945303/v1)
Supplement: Supplementary file 1 [file 309f19ba74e72a13428ad96f.docx]

Supplementary Material

Title: Obesity Misclassification from Self-Reported BMI in Older Adults: Implications for Obesity Burden and Disease Risk Characterization

Contents:

- Supplementary Table 1. Demographic and anthropometric characteristics of false negative obesity cases by height reporting error category among older adults in the Health and Retirement Study
- Supplementary Table 2. Demographic and anthropometric characteristics of false negative obesity cases by weight reporting error category among older adults in the Health and Retirement Study
- Supplementary Figure 1. ROC curve of self-reported BMI for identifying obesity (measured BMI ≥30 kg/m²)

| **Supplementary Table 1. Demographic and anthropometric characteristics of false negative obesity cases by height reporting error category among older adults in the Health and Retirement Study** | | | | |
| --- | --- | --- | --- | --- |
|  | Height error category | | |  |
|  | Underestimatea | Within rangeb | Overestimatec | p |
| N | 2 (0.2%) | 358 (29.9%) | 838 (69.9%) |  |
| Measured BMId (kg/m2) | 30.5 (0.2) | 30.9 (0.8) | 31.4 (1.1) | < .001 |
| Self-reported BMI (kg/m2) | 29.9 (0.1) | 29.2 (0.7) | 28.6 (1.0) | < .001 |
| Measured height (m) | 1.70(0.01) | 1.67 (0.10) | 1.65 (0.10) | .073 |
| Self-reported height (m) | 1.66 (0.02) | 1.68 (0.10) | 1.70 (0.10) | < .001 |
| Measured weight (kg) | 87.9 (0.80) | 86.3 (10.3) | 86.2 (10.5) | .968 |
| Self-reported weight (kg) | 82.8 (1.6) | 82.3 (9.8) | 83.5 (10.2) | .175 |
| Age (year) | 62.5 (9.2) | 65.4 (8.8) | 69.7 (9.4) | < .001 |
| Age groups (year) |  |  |  | < .001 |
| 50~59 | 1 (0.4%) | 113 (44.7%) | 139 (54.9%) |  |
| 60~69 | 1 (0.3%) | 132 (32.8%) | 269 (66.9%) |  |
| 70~79 | 0 (0.0%) | 89 (23.5%) | 290 (76.5%) |  |
| >=80 | 0 (0.0%) | 24 (14.6%) | 140 (85.4%) |  |
| Sex |  |  |  | .007 |
| Female | 0 (0.0%) | 211 (33.4%) | 421 (66.6%) |  |
| Male | 2 (0.4%) | 147 (26.0%) | 417 (73.7%) |  |
| Education |  |  |  | .007 |
| 0～8years | 1 (0.7%) | 23 (16.7%) | 114 (82.6%) |  |
| 9～11years | 0 (0.0%) | 35 (28.2%) | 89 (71.8%) |  |
| High school or General Equivalency Diploma | 1 (0.2%) | 129 (31.0%) | 286 (68.8%) |  |
| >12 years | 0 (0.0%) | 170 (32.9%) | 347 (67.1%) |  |
| Federal property level |  |  |  | .003 |
| <150% | 1 (0.7%) | 34 (23.0%) | 113 (76.4%) |  |
| 150~350% | 1 (0.2%) | 111 (25.7%) | 320 (74.1%) |  |
| >350% | 0 (0.0%) | 213 (34.5%) | 405 (65.5%) |  |
| Race/ethnicity |  |  |  | .515 |
| Non-Hispanic White | 1 (0.1%) | 278 (30.9%) | 622 (69.0%) |  |
| Non-Hispanic African American | 0 (0.0%) | 41 (27.7%) | 107 (72.3%) |  |
| Other | 0 (0.0%) | 7 (25.9%) | 20 (74.1%) |  |
| Hispanic | 1 (0.8%) | 32 (26.2%) | 89 (73.0%) |  |
| No. of chronic condition |  |  |  | .010 |
| 0 | 0 (0.0%) | 59 (35.5%) | 107 (64.5%) |  |
| 1 | 0 (0.0%) | 118 (34.6%) | 223 (65.4%) |  |
| 2 | 0 (0.0%) | 101 (29.9%) | 237 (70.1%) |  |
| 3 | 1 (0.4%) | 54 (23.0%) | 180 (76.6%) |  |
| 4 | 1 (0.9%) | 26 (22.0%) | 91 (77.1%) |  |
| Physical activity |  |  |  | .418 |
| Inactive | 0 (0.0%) | 47 (25.5%) | 137 (74.5%) |  |
| Insufficient | 2 (0.3%) | 188 (30.4%) | 428 (69.3%) |  |
| Active | 0 (0.0%) | 123 (31.1%) | 273 (68.9%) |  |
| Smoke |  |  |  | .295 |
| No | 2 (0.2%) | 312 (29.2%) | 754 (70.6%) |  |
| Yes | 0 (0.0%) | 43 (35.8%) | 77 (64.2%) |  |
| Mortality |  |  |  | < .001 |
| Alive | 0 (0.0%) | 288 (33.5%) | 572 (66.5%) |  |
| Dead | 2 (0.6%) | 70 (20.7%) | 266 (77.7%) |  |
| Note: a, underestimate ≥1 inch; b, within ±1 inch; c, underestimate ≥1 inch; d, body mass index | | | | |

| **Supplementary Table 2. Demographic and anthropometric characteristics of false negative obesity cases by weight reporting error category among older adults in the Health and Retirement Study** | | | | |
| --- | --- | --- | --- | --- |
|  | Weight error category | | |  |
|  | Under-reporta | Within rangeb | Over-reportc | p |
| N | 669 (55.8%) | 512 (42.7%) | 17 (1.4%) |  |
| Measured BMI (kg/m2) | 31.6 (1.2) | 30.9 (0.7) | 30.8 (0.7) | < .001 |
| Self-reported BMI (kg/m2) | 28.6 (1.0) | 29.0 (0.8) | 29.4 (0.6) | < .001 |
| Measured height (m) | 1.67 (0.10) | 1.65 (0.10) | 1.64 (0.12) | .001 |
| Self-reported height (m) | 1.70 (0.10) | 1.69 (0.10) | 1.71 (0.12) | .191 |
| Measured weight (kg) | 88.0 (10.3) | 84.0 (10.2) | 82.9 (11.3) | < .001 |
| Self-reported weight (kg) | 83.0 (10.0) | 83.2 (10.1) | 86.5 (11.0) | .358 |
| Age (year) | 67.5 (9.1) | 69.5 (9.6) | 74.8 (11.9) | <.001 |
| Age groups (year) |  |  |  | <.001 |
| 50~59 | 159 (62.9%) | 91 (36.0%) | 3 (1.19%) |  |
| 60~69 | 240 (59.7%) | 161 (40.1%) | 1 (0.3%) |  |
| 70~79 | 208 (54.9%) | 166 (43.8%) | 5 (1.3%) |  |
| ≥80 | 62 (37.8%) | 94 (57.3%) | 8 (4.9%) |  |
| Sex |  |  |  | .822 |
| Female | 350 (55.4%) | 274 (43.4%) | 8 (1.3%) |  |
| Male | 319 (56.4%) | 238 (42.1%) | 9 (1.6%) |  |
| Education |  |  |  | <.001 |
| 0～8years | 53 (38.4%) | 85 (61.6%) | 0 (0.0%) |  |
| 9～11years | 67 (54.0%) | 55 (44.4%) | 2 (1.6%) |  |
| High school or General Equivalency Diploma | 233 (56.0%) | 171 (41.1%) | 12 (2.9%) |  |
| >12 years | 315 (60.9%) | 199 (38.5%) | 3 (0.6%) |  |
| Federal property level |  |  |  | .003 |
| <150% | 76 (51.4%) | 66 (44.6%) | 6 (4.1%) |  |
| 150~350% | 223 (51.6%) | 204 (47.2%) | 5 (1.2%) |  |
| >350% | 370 (59.9%) | 242 (39.2%) | 6 (1.0%) |  |
| Race/ethnicity |  |  |  | .126 |
| Non-Hispanic White | 512 (56.8%) | 378 (42.0%) | 11 (1.2%) |  |
| Non-Hispanic African American | 87 (58.8%) | 57 (38.5%) | 4 (2.7%) |  |
| Other | 10 (37.0%) | 17 (63.0%) | 0 (0.0%) |  |
| Hispanic | 60 (49.2%) | 60 (49.2%) | 2 (1.6%) |  |
| No. of chronic condition |  |  |  | .057 |
| 0 | 100 (60.2%) | 66 (39.8%) | 0 (0.0%) |  |
| 1 | 198 (58.1%) | 140 (41.1%) | 3 (0.9%) |  |
| 2 | 188 (55.6%) | 146 (43.2%) | 4 (1.2%) |  |
| 3 | 128 (54.5%) | 102 (43.4%) | 5 (2.1%) |  |
| ≥4 | 55 (46.6%) | 58 (49.2%) | 5 (4.2%) |  |
| Physical activity |  |  |  | .030 |
| Inactive | 87 (47.3%) | 91 (49.5%) | 6 (3.3%) |  |
| Insufficient | 350 (56.6%) | 261 (42.2%) | 7 (1.1%) |  |
| Active | 232 (58.6%) | 160 (40.4%) | 4 (1.0%) |  |
| Smoke |  |  |  | .812 |
| No | 596 (55.8%) | 456 (42.7%) | 16 (1.5%) |  |
| Yes | 69 (57.5%) | 50 (41.7%) | 1 (0.8%) |  |
| Mortality |  |  |  | .001 |
| Alive | 497 (57.8%) | 358 (41.6%) | 5 (0.6%) |  |
| Dead | 172 (50.9%) | 154 (45.6%) | 12 (3.6%) |  |
| Note: a, underestimate ≥5 lb; b, within ±5 lb; c, overestimate ≥5 lb | | | | |


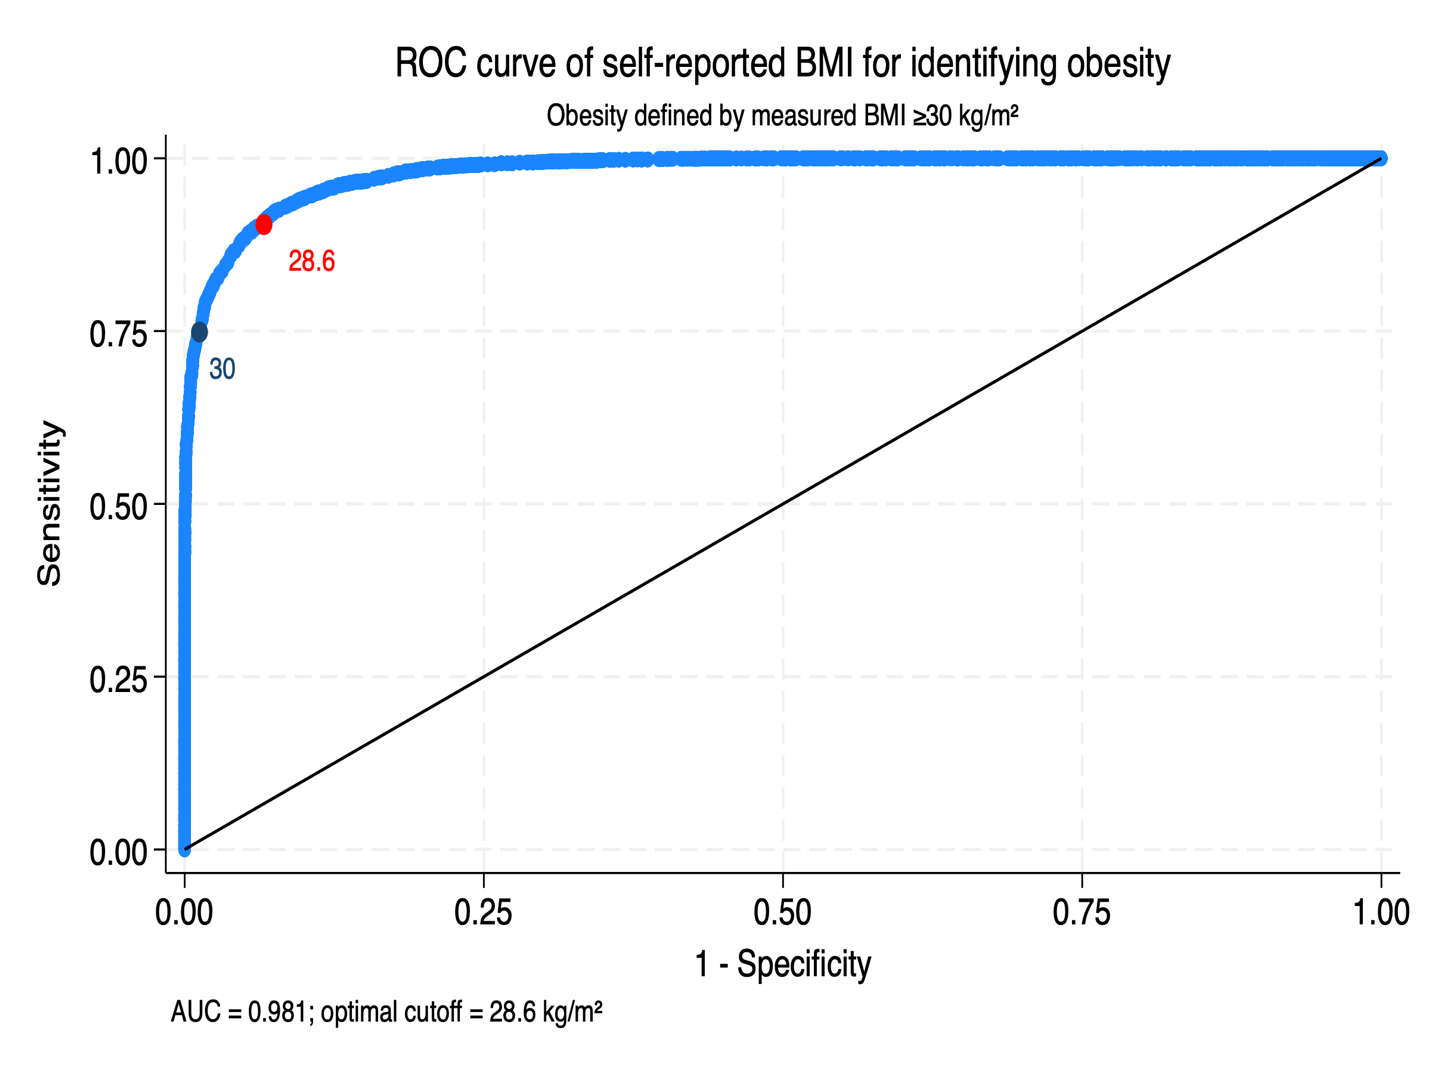


Supplementary Figure 1 Alt text. Receiver operating characteristic (ROC) curve illustrating the ability of self-reported BMI to discriminate between obese and non-obese individuals defined by measured BMI(≥30 kg/m²). The area under the curve (AUC ≈ 0.98) indicates excellent discrimination, and the optimal cut-off improves sensitivity while maintaining high specificity.
