# Supplementary material
Source: Research Square preprint supplement (doi:10.21203/rs.3.rs-9945303/v1)
Supplement: Supplementary file 2 [file 4801dc5272a916a2c0603ccf.xlsx]

## Sheet: Table_3
Table 3. Bland–Altman 95% limits of agreement for self-reported versus measured height, weight, and BMI across data cleaning stages among older adults in the Health and Retirement Study
		Pre-cleaning sample	Post-screening sample	Final analytic data
Height (m)	Mean bias	0.024	0.024	0.022
	Standard deviation	0.043	0.038	0.028
	Limits of agreement	0.1078 to -0.0692	0.0985 to -0.0505	0.0764 to -0.0334
	Regression	Y= -0.0692X+0.138	Y= -0.071X+0.141	Y= -0.0145X+0.0456
	R2	0.027	0.035	0.003
	N%, Mean bias > 1 inch	0.461	0.462	0.455
	N%, Mean bias < -1 inch	0.033	0.029	0.028
Weight (kg)	Mean bias	-1.374	---	-1.261
	Standard deviation	3.974	---	2.856
	Limits of agreement	6.415 to -9.163	---	4.33676 to -6.85876
	Regression	Y= -0.063X+3.683	---	Y= -0.047X+2.495
	R2	0.081	---	0.084
	N%, Mean bias > 5 lbs	0.079	---	0.075
	N%, Mean bias < -5 lbs	0.298	---	0.292
BMI (kg/m2)	Mean bias	-1.3	-1.33	-1.18
	Standard deviation	2.27	2.12	1.43
	Limits of agreement	3.1492 to -5.7492	2.8252 to -5.4852	1.6228 to -3.9828
	Regression	Y= -0.15X+3.21	Y= -0.154X+3.157	Y= -0.0965X+1.611
	R2	0.16	0.181	0.142
