# Supplementary material
Source: Research Square preprint supplement (doi:10.21203/rs.3.rs-9945303/v1)
Supplement: Supplementary file 3 [file 610a7ca115a7c854cf7cb404.xlsx]

## Sheet: Table_1
Table 1. Demographic characteristics of older adults in the Health and Retirement Study across data cleaning stages
	Initial sample	Post-screening sample	Final analytic sample
N	13058	13058	12695
Measured BMIa (kg/m2)	29.1 (5.9)	29.1 (5.9)	28.9 (5.6)
Self-reported BMI (kg/m2)	27.8 (5.4)	27.8 (5.3)	27.7 (5.2)
Measured height (m)	1.66 (0.10)	1.66 (0.10)	1.66 (0.10)
Self-reported height (m)	1.68 (0.10)	1.68 (0.10)	1.68 (0.10)
Measured weight (kg)	80.0 (17.9)	80.0 (17.9)	79.7 (17.6)
Self-reported weight (kg)	78.6 (17.2)	78.6 (17.2)	78.4 (17.0)
Age (year)	67.8 (9.8)	67.8 (9.8)	67.8 (9.8)
Age groups (year)
50~59	3,187 (24.4%)	3,187 (24.4%)	3,071 (24.2%)
60~69	4,433 (33.9%)	4,433 (33.9%)	4,325 (34.1%)
70~79	3,692 (28.3%)	3,692 (28.3%)	3,600 (28.4%)
³80	1,746 (13.4%)	1,746 (13.4%)	1,699 (13.4%)
Sex
Female	7,596 (58.2%)	7,596 (58.2%)	7,383 (58.2%)
Male	5,462 (41.8%)	5,462 (41.8%)	5,312 (41.8%)
Education
0～8years	1,253 (9.6%)	1,253 (9.6%)	1,191 (9.4%)
9～11years	1,595 (12.2%)	1,595 (12.2%)	1,555 (12.3%)
High school or General Equivalency Diploma	4,428 (34.0%)	4,428 (34.0%)	4,299 (33.9%)
>12 years	5,765 (44.2%)	5,765 (44.2%)	5,633 (44.4%)
Federal property level
<150%	1,638 (12.5%)	1,638 (12.5%)	1,557 (12.3%)
150~350%	4,908 (37.6%)	4,908 (37.6%)	4,766 (37.5%)
>350%	6,512 (49.9%)	6,512 (49.9%)	6,372 (50.2%)
Race/ethnicity
Non-Hispanic White	9,947 (76.2%)	9,947 (76.2%)	9,723 (76.6%)
Non-Hispanic African American	1,702 (13.0%)	1,702 (13.0%)	1,614 (12.7%)
Other	285 (2.2%)	285 (2.2%)	273 (2.2%)
Hispanic	1,123 (8.6%)	1,123 (8.6%)	1,084 (8.5%)
No. of chronic condition
0	2,197 (16.8%)	2,197 (16.8%)	2,133 (16.8%)
1	3,621 (27.7%)	3,621 (27.7%)	3,550 (28.0%)
2	3,660 (28.0%)	3,660 (28.0%)	3,553 (28.0%)
3	2,220 (17.0%)	2,220 (17.0%)	2,155 (17.0%)
³4	1,360 (10.4%)	1,360 (10.4%)	1,304 (10.3%)
Physical activity
Inactive	2,279 (17.5%)	2,279 (17.5%)	2,182 (17.2%)
Insufficient	6,695 (51.3%)	6,695 (51.3%)	6,514 (51.3%)
Active	4,076 (31.2%)	4,076 (31.2%)	3,991 (31.5%)
Smoker
No	11,236 (86.7%)	11,236 (86.7%)	10,930 (86.7%)
Yes	1,727 (13.3%)	1,727 (13.3%)	1,673 (13.3%)
Mortality
Alive	9,123 (69.9%)	9,123 (69.9%)	8,878 (69.9%)
Dead	3,935 (30.1%)	3,935 (30.1%)	3,817 (30.1%)
Note: a, body mass index
