# Supplementary material
Source: Research Square preprint supplement (doi:10.21203/rs.3.rs-9945303/v1)
Supplement: Supplementary file 4 [file 6ca4e6daca6167ae33a1c5a8.xlsx]

## Sheet: Table_2
Table 2. Comparison of self-reported and measured BMI and mean differences across demographic and health subgroups among older adults in the Health and Retirement Study
	Sample N (%)		rBMIa, Mean (SDc)	mBMIb, Mean (SD)	Mean Difference (rBMI - mBMI), mean (95% CId)
Overall	12,695 (100%)		27.7 (5.2)*	28.9 (5.6)	-1.18 (-1.21, -1.16)
Age (year)
50–59	3071 (24.19%)		28.68 (5.64)*	29.70 (6.01)	-1.03 (-1.08, -0.98)
60–69	4325 (34.07%)		28.34 (5.17)*	29.53 (5.57)	-1.19 (-1.23, -1.14)
70–79	3600 (28.36%)		27.35 (4.85)*	28.60 (5.26)	-1.25 (-1.30, -1.20)
≥80	1699 (13.38%)		25.28 (4.29)*	26.58 (4.63)	-1.29 (-1.36, -1.22)
Sex
Male	5312 (41.84%)		27.75 (4.32)*	28.90 (4.67)	-1.16 (-1.19, -1.12)
Female	7383 (58.16%)		27.72 (5.76)*	28.92 (6.14)	-1.20 (-1.23, -1.16)
Race/ethnicity
NH White	9723 (76.6%)		27.41 (5.09)*	28.62 (5.47)	-1.21 (-1.24, -1.18)
NH Black	1614 (12.7%)		29.18 (5.63)*	30.26 (6.03)	-1.08 (-1.16, -1.00)
Hispanic	1084 (8.5%)		28.56 (4.95)*	29.66 (5.26)	-1.10 (-1.21, -1.00)
Other	273 (2.2%)		27.51 (5.80)*	28.55 (6.16)	-1.05 (-1.22, -0.87)
Physical activity
Inactive		2182 (17.20%)	28.82 (6.30)*	30.03 (6.58)	-1.21 (-1.28, -1.15)
Insufficient		6514 (51.34%)	27.81 (5.07)*	28.99 (5.48)	-1.18 (-1.22, -1.15)
Active		3991 (31.46%)	27.02 (4.62)*	28.18 (4.99)	-1.16 (-1.20, -1.11)
Smoke
Non-smoker		10930 (86.73%)	27.93 (5.21)*	29.16 (5.57)	-1.23 (-1.25, -1.2-)
Smoker		1673 (13.27%)	26.45 (5.03)*	27.32 (5.40)	-0.87 (-0.94, -0.80)
Federal poverty level
<150%		1557 (12.26%)	28.16 (5.78)*	29.24 (6.10)	-1.08 (-1.16, -1.00)
150–350%		4766 (37.54%)	27.73 (5.39)*	28.93 (5.76)	-1.20 (-1.25, -1.16)
>350%		6372 (50.19%)	27.63 (4.90)*	28.82 (5.29)	-1.19 (-1.22, -1.15)
Note: a, self-reported body mass index; b, measured body mass index; c, standard deviation; d, CI, confidence interval. All mean differences were calculated using paired t-tests; * p < .001.
